# Supplementary material for: Spatio-Temporal Dynamics of Yeast Mitochondrial Biogenesis: Transcriptional and Post-Transcriptional mRNA Oscillatory Modules
Source: PLoS Comput Biol. 2009 Jun 12;5(6):e1000409. doi: 10.1371/journal.pcbi.1000409 (PMC2690403; doi:10.1371/journal.pcbi.1000409)
Supplement: Dataset S4 — Distribution of genes into 11 major functional classes, and properties of the genes. (0.12 MB XLS) [file pcbi.1000409.s007.xls]

## Sheet: Functional_Classes
	Gene ID	Standard name	Module number (Perocchi et al.)	Module name (Perocchi et al.)	MLR Classification (Saint-Georges et al.)	Functional class (This work)	EDPM phase (This work)
Class 1 - TRANSLATION MACHINERY	YBL038W	MRPL16	79	MRPL	Class I	TRANSLATION MACHINERY	A
	YBR122C	MRPL36	79	MRPL	Class I	TRANSLATION MACHINERY	A
	YBR268W	MRPL37	79	MRPL	Class I	TRANSLATION MACHINERY	A
	YCR003W	MRPL32	79	MRPL	Class I	TRANSLATION MACHINERY	A
	YCR046C	IMG1	79	MRPL	Class I	TRANSLATION MACHINERY	A
	YCR071C	IMG2	79	MRPL	Class I	TRANSLATION MACHINERY	A
	YDL202W	MRPL11	79	MRPL	Class I	TRANSLATION MACHINERY	A
	YDR115W	YDR115W	79	MRPL	Class I	TRANSLATION MACHINERY	A
	YDR116C	MRPL1	79	MRPL	Class I	TRANSLATION MACHINERY	A
	YDR237W	MRPL7	79	MRPL	Class I	TRANSLATION MACHINERY	A
	YDR296W	MHR1	79	MRPL	Class I	TRANSLATION MACHINERY	A
	YDR322W	MRPL35	79	MRPL	Class I	TRANSLATION MACHINERY	A
	YDR405W	MRP20	79	MRPL	Class I	TRANSLATION MACHINERY	A
	YDR462W	MRPL28	79	MRPL	Class I	TRANSLATION MACHINERY	A
	YEL050C	RML2	79	MRPL	Class I	TRANSLATION MACHINERY	A
	YGL068W	MNP1	79	MRPL	Class I	TRANSLATION MACHINERY	A
	YGR076C	MRPL25	79	MRPL	Class I	TRANSLATION MACHINERY	A
	YGR220C	MRPL9	79	MRPL	Class I	TRANSLATION MACHINERY	A
	YHR147C	MRPL6	79	MRPL	Class I	TRANSLATION MACHINERY	A
	YJL063C	MRPL8	79	MRPL	Class I	TRANSLATION MACHINERY	A
	YJL096W	MRPL49	79	MRPL	Class I	TRANSLATION MACHINERY	A
	YKL138C	MRPL31	79	MRPL	Class I	TRANSLATION MACHINERY	A
	YKL167C	MRP49	79	MRPL	Class I	TRANSLATION MACHINERY	A
	YKL170W	MRPL38	79	MRPL	Class I	TRANSLATION MACHINERY	A
	YKR006C	MRPL13	79	MRPL	Class I	TRANSLATION MACHINERY	A
	YKR085C	MRPL20	79	MRPL	Class I	TRANSLATION MACHINERY	A
	YLR312W-A	MRPL15	79	MRPL	Class I	TRANSLATION MACHINERY	A
	YLR439W	MRPL4	79	MRPL	Class I	TRANSLATION MACHINERY	A
	YML009C	MRPL39	79	MRPL	Class I	TRANSLATION MACHINERY	A
	YML025C	YML6	79	MRPL	Class I	TRANSLATION MACHINERY	A
	YMR024W	MRPL3	79	MRPL	Class I	TRANSLATION MACHINERY	A
	YMR193W	MRPL24	79	MRPL	Class I	TRANSLATION MACHINERY	A
	YMR225C	MRPL44	79	MRPL	Class I	TRANSLATION MACHINERY	A
	YMR286W	MRPL33	79	MRPL	Class I	TRANSLATION MACHINERY	A
	YNL005C	MRP7	79	MRPL	Class I	TRANSLATION MACHINERY	A
	YNL177C	MRPL22	79	MRPL	Class I	TRANSLATION MACHINERY	A
	YNL185C	MRPL19	79	MRPL	Class I	TRANSLATION MACHINERY	A
	YNL252C	MRPL17	79	MRPL	Class I	TRANSLATION MACHINERY	A
	YNL284C	MRPL10	79	MRPL	Class I	TRANSLATION MACHINERY	A
	YNR022C	MRPL50	79	MRPL	Class I	TRANSLATION MACHINERY	A
	YPL173W	MRPL40	79	MRPL	Class I	TRANSLATION MACHINERY	A
	YPR100W	MRPL51	79	MRPL	Class I	TRANSLATION MACHINERY	A
	YGL064C	MRH4	79	MRPL	Class I	TRANSLATION MACHINERY	F
	YOR201C	MRM1	108	No data	Class I	TRANSLATION MACHINERY	F
	YBR282W	MRPL27	79	MRPL	Class III	TRANSLATION MACHINERY	A
	YOR150W	MRPL23	79	MRPL	Class III	TRANSLATION MACHINERY	A
	YPL183W-A	RTC6	79	MRPL?	Class III	TRANSLATION MACHINERY	A
	YBL090W	MRP21	99	MRPS	Class I	TRANSLATION MACHINERY	A
	YBR146W	MRPS9	99	MRPS	Class I	TRANSLATION MACHINERY	A
	YBR251W	MRPS5	99	MRPS	Class I	TRANSLATION MACHINERY	A
	YDR041W	RSM10	99	MRPS	Class I	TRANSLATION MACHINERY	A
	YDR175C	RSM24	99	MRPS	Class I	TRANSLATION MACHINERY	A
	YDR337W	MRPS28	99	MRPS	Class I	TRANSLATION MACHINERY	A
	YDR347W	MRP1	99	MRPS	Class I	TRANSLATION MACHINERY	A
	YDR494W	RSM28	_	No data	Class I	TRANSLATION MACHINERY	A
	YER050C	RSM18	99	MRPS	Class I	TRANSLATION MACHINERY	A
	YGL129C	RSM23	99	MRPS	Class I	TRANSLATION MACHINERY	A
	YGR084C	MRP13	99	MRPS	Class I	TRANSLATION MACHINERY	A
	YGR150C	YGR150C	99	MRPS	Class I	TRANSLATION MACHINERY	A
	YGR165W	MRPS35	99	MRPS	Class I	TRANSLATION MACHINERY	A
	YHL004W	MRP4	99	MRPS	Class I	TRANSLATION MACHINERY	A
	YIL093C	RSM25	99	MRPS	Class I	TRANSLATION MACHINERY	A
	YJR101W	RSM26	99	MRPS	Class I	TRANSLATION MACHINERY	A
	YJR113C	RSM7	99	MRPS	Class I	TRANSLATION MACHINERY	A
	YKL003C	MRP17	99	MRPS	Class I	TRANSLATION MACHINERY	A
	YMR158W	MRPS8	99	MRPS	Class I	TRANSLATION MACHINERY	A
	YMR188C	MRPS17	99	MRPS	Class I	TRANSLATION MACHINERY	A
	YNL081C	SWS2	99	MRPS	Class I	TRANSLATION MACHINERY	A
	YNL137C	NAM9	99	MRPS	Class I	TRANSLATION MACHINERY	A
	YNL306W	MRPS18	99	MRPS	Class I	TRANSLATION MACHINERY	A
	YNR037C	RSM19	99	MRPS	Class I	TRANSLATION MACHINERY	A
	YOR158W	PET123	99	MRPS	Class I	TRANSLATION MACHINERY	A
	YPL118W	MRP51	99	MRPS	Class I	TRANSLATION MACHINERY	A
	YPR166C	MRP2	99	MRPS	Class I	TRANSLATION MACHINERY	A
	YDR036C	EHD3	99	MRPS	Class I	TRANSLATION MACHINERY	B
	YKL155C	RSM22	99	MRPS	Class I	TRANSLATION MACHINERY	F
	YOR205C	FMP38	99	MRPS	Class I	TRANSLATION MACHINERY	F
	YGR215W	RSM27	99	MRPS	Class III	TRANSLATION MACHINERY	A
	YPL013C	MRPS16	99	MRPS	Class III	TRANSLATION MACHINERY	A
	YDL045W-A	MRP10	99	MRPS	Class III	TRANSLATION MACHINERY	A
	YNR036C	MRPS12	99	MRPS	Class III	TRANSLATION MACHINERY	B
	YFR049W	YMR31	99	MRPS	Class III	TRANSLATION MACHINERY	B
	YHR075C	PPE1	99	MRPS?	Class III	TRANSLATION MACHINERY	C
Class 2 - TRANSLATION REGULATION	YBL080C	PET112	62	Translat,regulatoractivity	Class I	TRANSLATION REGULATION	A
	YBR120C	CBP6	62	Translat,regulatoractivity	Class I	TRANSLATION REGULATION	A
	YCR024C	SLM5	_	Translat,regulatoractivity	Class I	TRANSLATION REGULATION	A
	YDR268W	MSW1	129	Translat,regulatoractivity	Class I	TRANSLATION REGULATION	A
	YER087W	YER087W	_	Translat,regulatoractivity	Class I	TRANSLATION REGULATION	A
	YGL107C	RMD9	126	Translat,regulatoractivity	Class I	TRANSLATION REGULATION	A
	YGL143C	MRF1	78	Translat,regulatoractivity	Class I	TRANSLATION REGULATION	A
	YGR147C	NAT2	74	Translat,regulatoractivity	Class I	TRANSLATION REGULATION	A
	YGR171C	MSM1	146	Translat,regulatoractivity	Class I	TRANSLATION REGULATION	A
	YHR011W	DIA4	66	Translat,regulatoractivity	Class I	TRANSLATION REGULATION	A
	YHR038W	RRF1	_	Translat,regulatoractivity	Class I	TRANSLATION REGULATION	A
	YHR091C	MSR1	84	Translat,regulatoractivity	Class I	TRANSLATION REGULATION	A
	YHR168W	MTG2	118	Translat,regulatoractivity	Class I	TRANSLATION REGULATION	A
	YJL102W	MEF2	67	Translat,regulatoractivity	Class I	TRANSLATION REGULATION	A
	YKL194C	MST1	66	Translat,regulatoractivity	Class I	TRANSLATION REGULATION	A
	YLR067C	PET309	62	Translat,regulatoractivity	Class I	TRANSLATION REGULATION	A
	YLR069C	MEF1	67	Translat,regulatoractivity	Class I	TRANSLATION REGULATION	A
	YLR203C	MSS51	62	Translat,regulatoractivity	Class I	TRANSLATION REGULATION	A
	YLR289W	GUF1	101	Translat,regulatoractivity	Class I	TRANSLATION REGULATION	A
	YMR257C	PET111	62	Translat,regulatoractivity	Class I	TRANSLATION REGULATION	A
	YMR282C	AEP2	62	Translat,regulatoractivity	Class I	TRANSLATION REGULATION	A
	YMR287C	MSU1	62	Translat,regulatoractivity	Class I	TRANSLATION REGULATION	A
	YNL073W	MSK1	62	Translat,regulatoractivity	Class I	TRANSLATION REGULATION	A
	YOL023W	IFM1	65	Translat,regulatoractivity	Class I	TRANSLATION REGULATION	A
	YOL033W	MSE1	31	Translat,regulatoractivity	Class I	TRANSLATION REGULATION	A
	YOR187W	TUF1	67	Translat,regulatoractivity	Class I	TRANSLATION REGULATION	A
	YPL029W	SUV3	62	Translat,regulatoractivity	Class I	TRANSLATION REGULATION	A
	YPL040C	ISM1	84	Translat,regulatoractivity	Class I	TRANSLATION REGULATION	A
	YPL097W	MSY1	80	Translat,regulatoractivity	Class I	TRANSLATION REGULATION	A
	YPL104W	MSD1	80	Translat,regulatoractivity	Class I	TRANSLATION REGULATION	A
	YPR047W	MSF1	80	Translat,regulatoractivity	Class I	TRANSLATION REGULATION	A
	YNR045W	PET494	62	Translat,regulatoractivity	Class I	TRANSLATION REGULATION	B
	YGR169C	PUS6	_	Translat,regulatoractivity	Class I	TRANSLATION REGULATION	F
	YPR125W	YLH47	_	Translat,regulatoractivity	Class I	TRANSLATION REGULATION	F
	YPR155C	NCA2	_	Translat,regulatoractivity	Class II	TRANSLATION REGULATION	C
	YBR121C	GRS1	19	Translat,regulatoractivity	Class II	TRANSLATION REGULATION	F
	YDL069C	CBS1	62	Translat,regulatoractivity	Class III	TRANSLATION REGULATION	F
	YDR194C	MSS116	61	RNAsplicing	Class I	TRANSLATION REGULATION	A
	YLR382C	NAM2	61	RNAsplicing	Class I	TRANSLATION REGULATION	A
	YDL044C	MTF2	61	RNAsplicing	Class I	TRANSLATION REGULATION	A
	YIR021W	MRS1	61	RNAsplicing	Class I	TRANSLATION REGULATION	A
	YGL236C	MTO1	61	RNAsplicing	Class I	TRANSLATION REGULATION	A
	YDL033C	SLM3	61	RNAsplicing	Class I	TRANSLATION REGULATION	F
	YKR052C	MRS4	61	RNAsplicing	Class II	TRANSLATION REGULATION	B
	YPR134W	MSS18	61	RNAsplicing	Class II	TRANSLATION REGULATION	C
	YJL133W	MRS3	61	RNAsplicing	Class II	TRANSLATION REGULATION	F
	YMR023C	MSS1	61	RNAsplicing	Class III	TRANSLATION REGULATION	A
Class 3 - ASSEMBLY FACTORS	YLR139C	SLS1	28	RCCasm	Class I	ASSEMBLY FACTORS	A
	YBR044C	TCM62	37	RCCasm2	Class I	ASSEMBLY FACTORS	A
	YDR375C	BCS1	9	RCCasm3	Class I	ASSEMBLY FACTORS	A
	YPL215W	CBP3	25	RCCasm3	Class I	ASSEMBLY FACTORS	A
	YGR174C	CBP4	25	RCCasm3	Class III	ASSEMBLY FACTORS	B
	YBR037C	SCO1	69	RCCasm4	Class I	ASSEMBLY FACTORS	A
	YDL107W	MSS2	18	RCCasm4	Class I	ASSEMBLY FACTORS	A
	YDR079W	PET100	18	RCCasm4	Class I	ASSEMBLY FACTORS	A
	YER058W	PET117	18	RCCasm4	Class I	ASSEMBLY FACTORS	A
	YGR112W	SHY1	18	RCCasm4	Class I	ASSEMBLY FACTORS	A
	YHR116W	COX23	18	RCCasm4	Class I	ASSEMBLY FACTORS	A
	YIL157C	COA1	_	RCCasm4	Class I	ASSEMBLY FACTORS	A
	YJR034W	PET191	18	RCCasm4	Class I	ASSEMBLY FACTORS	A
	YLL009C	COX17	69	RCCasm4	Class I	ASSEMBLY FACTORS	A
	YLR204W	COX24	100	RCCasm4	Class I	ASSEMBLY FACTORS	A
	YML129C	COX14	18	RCCasm4	Class I	ASSEMBLY FACTORS	A
	YOR266W	PNT1	18	RCCasm4	Class I	ASSEMBLY FACTORS	A
	YPL132W	COX11	69	RCCasm4	Class I	ASSEMBLY FACTORS	A
	YPL172C	COX10	69	RCCasm4	Class I	ASSEMBLY FACTORS	A
	YDR316W	OMS1	32	RCCasm4*	Class I	ASSEMBLY FACTORS	A
	YER154W	OXA1	32	RCCasm4*	Class I	ASSEMBLY FACTORS	A
	YBR024W	SCO2	69	RCCasm4	Class I	ASSEMBLY FACTORS	B
	YDR231C	COX20	18	RCCasm4	Class I	ASSEMBLY FACTORS	C
	YGR062C	COX18	18	RCCasm4	Class I	ASSEMBLY FACTORS	F
	YIL098C	FMC1	9	RCCasm5	Class I	ASSEMBLY FACTORS	A
	YJL180C	ATP12	9	RCCasm5	Class I	ASSEMBLY FACTORS	A
	YMR098C	ATP25	23	RCCasm5	Class I	ASSEMBLY FACTORS	A
	YNL315C	ATP11	9	RCCasm5	Class I	ASSEMBLY FACTORS	A
	YPL005W	AEP3	_	RCCasm5	Class I	ASSEMBLY FACTORS	C
	YNR020C	ATP23	3	RCCasm5	Class I	ASSEMBLY FACTORS	F
	YLR393W	ATP10	28	RCCasm5	Class II	ASSEMBLY FACTORS	A
	YDR350C	TCM10	9	RCCasm5	Class II	ASSEMBLY FACTORS	C
Class 4 - PROTEIN IMPORT	YBR185C	MBA1	10	Mito,proteintargeting	Class I	PROTEIN IMPORT	A
	YGR028W	MSP1	10	Mito,proteintargeting	Class I	PROTEIN IMPORT	A
	YMR089C	YTA12	10	Mito,proteintargeting	Class I	PROTEIN IMPORT	A
	YER017C	AFG3	10	Mito,proteintargeting	Class I	PROTEIN IMPORT	B
	YLR450W	HMG2	10	Mito,proteintargeting	Class II	PROTEIN IMPORT	C
	YBL022C	PIM1	15	Matrixproteinimport	Class I	PROTEIN IMPORT	A
	YDR430C	CYM1	37	Matrixproteinimport	Class I	PROTEIN IMPORT	A
	YJR045C	SSC1	15	Matrixproteinimport	Class I	PROTEIN IMPORT	A
	YKL195W	MIA40	89	Matrixproteinimport	Class I	PROTEIN IMPORT	A
	YLR259C	HSP60	15	Matrixproteinimport	Class I	PROTEIN IMPORT	A
	YOR020C	HSP10	15	Matrixproteinimport	Class I	PROTEIN IMPORT	A
	YDR258C	HSP78	15	Matrixproteinimport	Class I	PROTEIN IMPORT	C
	YHR024C	MAS2	131	Matrixproteinimport	Class I	PROTEIN IMPORT	F
	YOR232W	MGE1	15	Matrixproteinimport	Class I	PROTEIN IMPORT	F
	YLR163C	MAS1	131	Matrixproteinimport	Class II	PROTEIN IMPORT	A
	YBR227C	MCX1	15	Matrixproteinimport	Class II	PROTEIN IMPORT	E
	YHR005C-A	MRS11	16	Tim23/Tim22complex	Class I	PROTEIN IMPORT	A
	YIL022W	TIM44	16	Tim23/Tim22complex	Class I	PROTEIN IMPORT	A
	YKR065C	PAM17	143	Tim23/Tim22complex	Class I	PROTEIN IMPORT	A
	YJL054W	TIM54	16	Tim23/Tim22complex	Class I	PROTEIN IMPORT	F
	YJL104W	PAM16	16	Tim23/Tim22complex	Class I	PROTEIN IMPORT	F
	YLR008C	PAM18	16	Tim23/Tim22complex	Class I	PROTEIN IMPORT	F
	YOR297C	TIM18	16	Tim23/Tim22complex	Class I	PROTEIN IMPORT	F
	YGR033C	TIM21	16	Tim23/Tim22complex	Class II	PROTEIN IMPORT	C
	YPL063W	TIM50	16	Tim23/Tim22complex	Class II	PROTEIN IMPORT	F
	YEL020W-A	TIM9	16	Tim23/Tim22complex	Class III	PROTEIN IMPORT	A
	YGR181W	TIM13	16	Tim23/Tim22complex	Class III	PROTEIN IMPORT	A
	YJL143W	TIM17	16	Tim23/Tim22complex	Class III	PROTEIN IMPORT	A
	YBR091C	MRS5	16	Tim23/Tim22complex	Class III	PROTEIN IMPORT	F
	YNR017W	MAS6	16	Tim23/Tim22complex	Class III	PROTEIN IMPORT	F
	YGR082W	TOM20	49	TOMcomplex	Class I	PROTEIN IMPORT	A
	YPR133W-A	TOM5	49	TOMcomplex	Class I	PROTEIN IMPORT	A
	YNL026W	SAM50	49	TOMcomplex	Class I	PROTEIN IMPORT	B
	YNL121C	TOM70	49	TOMcomplex	Class II	PROTEIN IMPORT	A
	YHR083W	SAM35	49	TOMcomplex	Class III	PROTEIN IMPORT	A
	YMR060C	SAM37	49	TOMcomplex	Class III	PROTEIN IMPORT	A
	YMR203W	TOM40	49	TOMcomplex	Class III	PROTEIN IMPORT	A
	YNL070W	TOM7	49	TOMcomplex	Class III	PROTEIN IMPORT	A
	YOR045W	TOM6	49	TOMcomplex	Class III	PROTEIN IMPORT	A
	YNL131W	TOM22	49	TOMcomplex	Class III	PROTEIN IMPORT	B
Class 5 - MORPHOLOGY	YGL219C	MDM34	6	Mito,org,andmorph,	Class I	MORPHOLOGY	B
	YGR231C	PHB2	6	Mito,org,andmorph,	Class II	MORPHOLOGY	B
	YGR132C	PHB1	6	Mito,org,andmorph,	Class III	MORPHOLOGY	B
	YJL066C	MPM1	6	Mito,org,andmorph,	Class III	MORPHOLOGY	B
	YJL112W	MDV1	64	Morph.Fus.Fis.	Class I	MORPHOLOGY	A
	YPL072W	UBP16	7	Morph.Fus.Fis.	Class I	MORPHOLOGY	A
	YDR393W	SHE9	_	Morph.Fus.Fis.	Class I	MORPHOLOGY	F
	YLL001W	DNM1	64	Morph.Fus.Fis.	Class II	MORPHOLOGY	A
	YKR036C	CAF4	154	Morph.Fus.Fis.	Class II	MORPHOLOGY	E
Class 6 - TRANSPORT	YDR061W	YDR061W	_	Transport	Class I	TRANSPORT	A
	YFR045W	YFR045W	115	Transport	Class I	TRANSPORT	A
	YGR257C	MTM1	9	Transport	Class I	TRANSPORT	A
	YMR166C	YMR166C	28	Transport	Class I	TRANSPORT	A
	YPR011C	YPR011C	115	Transport	Class I	TRANSPORT	A
	YHR002W	LEU5	102	Transport	Class I	TRANSPORT	B
	YIL006W	YIA6	_	Transport	Class I	TRANSPORT	B
	YPL224C	MMT2	119	Transport	Class I	TRANSPORT	B
	YLL048C	YBT1	_	Transport	Class I	TRANSPORT	E
	YBR192W	RIM2	87	Transport	Class I	TRANSPORT	F
	YIL134W	FLX1	38	Transport	Class I	TRANSPORT	F
	YOR222W	ODC2	5	Transport	Class I	TRANSPORT	F
	YBL030C	PET9	134	Transport	Class II	TRANSPORT	A
	YER053C	PIC2	_	Transport	Class II	TRANSPORT	B
	YOR100C	CRC1	115	Transport	Class II	TRANSPORT	B
	YAR035W	YAT1	123	Transport	Class II	TRANSPORT	C
	YER024W	YAT2	123	Transport	Class II	TRANSPORT	C
	YGL104C	VPS73	126	Transport	Class II	TRANSPORT	C
	YLR348C	DIC1	_	Transport	Class II	TRANSPORT	C
	YML042W	CAT2	123	Transport	Class II	TRANSPORT	C
	YNL125C	ESBP6	_	Transport	Class II	TRANSPORT	C
	YBR069C	TAT1	70	Transport	Class II	TRANSPORT	E
	YDL198C	GGC1	13	Transport	Class II	TRANSPORT	F
	YMR177W	MMT1	119	Transport	Class II	TRANSPORT	F
	YMR301C	ATM1	96	Transport	Class II	TRANSPORT	F
	YNL083W	SAL1	115	Transport	Class III	TRANSPORT	A
	YMR056C	AAC1	134	Transport	Class III	TRANSPORT	B
	YBR085W	AAC3	134	Transport	Class III	TRANSPORT	F
	YBR291C	CTP1	24	Transport	Class III	TRANSPORT	F
Class 7 - Fe-S CLUSTERS	YDR376W	ARH1	20	Iron-sulfurclusterasm	Class I	Fe-S CLUSTERS	A
	YJR122W	CAF17	154	Iron-sulfurclusterasm	Class I	Fe-S CLUSTERS	A
	YPR067W	ISA2	20	Iron-sulfurclusterasm	Class I	Fe-S CLUSTERS	A
	YER141W	COX15	20	Iron-sulfurclusterasm	Class I	Fe-S CLUSTERS	B
	YGL018C	JAC1	20	Iron-sulfurclusterasm	Class I	Fe-S CLUSTERS	F
	YPL252C	YAH1	20	Iron-sulfurclusterasm	Class I	Fe-S CLUSTERS	F
	YPL135W	ISU1	20	Iron-sulfurclusterasm	Class II	Fe-S CLUSTERS	C
	YCL017C	NFS1	20	Iron-sulfurclusterasm	Class II	Fe-S CLUSTERS	F
	YDL120W	YFH1	20	Iron-sulfurclusterasm	Class III	Fe-S CLUSTERS	A
	YPL059W	GRX5	20	Iron-sulfurclusterasm	Class III	Fe-S CLUSTERS	A
	YLL027W	ISA1	20	Iron-sulfurclusterasm	Class III	Fe-S CLUSTERS	F
	YOR226C	ISU2	20	Iron-sulfurclusterasm	Class III	Fe-S CLUSTERS	F
Class 8 - RESPIRATORY CHAIN COMPLEXES	YKL148C	SDH1	147	RCC-II	Class I	RESPIRATORY CHAIN COMPLEXES	A
	YKL141W	SDH3	147	RCC-II	Class II	RESPIRATORY CHAIN COMPLEXES	B
	YLL041C	SDH2	147	RCC-II	Class II	RESPIRATORY CHAIN COMPLEXES	B
	YDR178W	SDH4	147	RCC-II	Class III	RESPIRATORY CHAIN COMPLEXES	B
	YLR164W	YLR164W	147	RCC-II	Class III	RESPIRATORY CHAIN COMPLEXES	D
	YJL045W	YJL045W	147	RCC-II	Class III	RESPIRATORY CHAIN COMPLEXES	D
	YMR118C	YMR118C	147	RCC-II	Class III	RESPIRATORY CHAIN COMPLEXES	D
	YOR065W	CYT1	156	RCC-III	Class II	RESPIRATORY CHAIN COMPLEXES	B
	YBL045C	COR1	156	RCC-III	Class II	RESPIRATORY CHAIN COMPLEXES	B
	YEL024W	RIP1	156	RCC-III	Class III	RESPIRATORY CHAIN COMPLEXES	A
	YPR191W	QCR2	156	RCC-III	Class III	RESPIRATORY CHAIN COMPLEXES	A
	YDR529C	QCR7	156	RCC-III	Class III	RESPIRATORY CHAIN COMPLEXES	A
	YFR033C	QCR6	156	RCC-III	Class III	RESPIRATORY CHAIN COMPLEXES	B
	YHR001W-A	QCR10	156	RCC-III	Class III	RESPIRATORY CHAIN COMPLEXES	B
	YNL052W	COX5A	1	RCC-IV	Class III	RESPIRATORY CHAIN COMPLEXES	A
	YGL187C	COX4	1	RCC-IV	Class III	RESPIRATORY CHAIN COMPLEXES	B
	YGL191W	COX13	1	RCC-IV	Class III	RESPIRATORY CHAIN COMPLEXES	B
	YHR051W	COX6	1	RCC-IV	Class III	RESPIRATORY CHAIN COMPLEXES	B
	YLR038C	COX12	1	RCC-IV	Class III	RESPIRATORY CHAIN COMPLEXES	B
	YLR395C	COX8	1	RCC-IV	Class III	RESPIRATORY CHAIN COMPLEXES	B
	YMR256C	COX7	1	RCC-IV	Class III	RESPIRATORY CHAIN COMPLEXES	B
	YEL039C	CYC7	1	RCC-IV	Class III	RESPIRATORY CHAIN COMPLEXES	C
	YBL099W	ATP1	155	RCC-V	Class I	RESPIRATORY CHAIN COMPLEXES	B
	YBR039W	ATP3	155	RCC-V	Class II	RESPIRATORY CHAIN COMPLEXES	A
	YJR121W	ATP2	155	RCC-V	Class II	RESPIRATORY CHAIN COMPLEXES	B
	YDL004W	ATP16	155	RCC-V	Class III	RESPIRATORY CHAIN COMPLEXES	A
	YDR298C	ATP5	155	RCC-V	Class III	RESPIRATORY CHAIN COMPLEXES	A
	YDR322C-A	TIM11	155	RCC-V	Class III	RESPIRATORY CHAIN COMPLEXES	A
	YLR295C	ATP14	155	RCC-V	Class III	RESPIRATORY CHAIN COMPLEXES	A
	YPR020W	ATP20	155	RCC-V	Class III	RESPIRATORY CHAIN COMPLEXES	A
	YDL181W	INH1	155	RCC-V	Class III	RESPIRATORY CHAIN COMPLEXES	B
	YDR377W	ATP17	155	RCC-V	Class III	RESPIRATORY CHAIN COMPLEXES	B
	YKL016C	ATP7	155	RCC-V	Class III	RESPIRATORY CHAIN COMPLEXES	B
	YML081C-A	ATP18	155	RCC-V	Class III	RESPIRATORY CHAIN COMPLEXES	B
Class 9 - TCA CYCLE	YOR142W	LSC1	147	TCA	Class I	TCA CYCLE	C
	YCR005C	CIT2	95	TCA	Class II	TCA CYCLE	A
	YDL066W	IDP1	149	TCA	Class II	TCA CYCLE	A
	YIL125W	KGD1	37	TCA	Class II	TCA CYCLE	A
	YML120C	NDI1	95	TCA	Class II	TCA CYCLE	A
	YMR145C	NDE1	95	TCA	Class II	TCA CYCLE	A
	YNL037C	IDH1	149	TCA	Class II	TCA CYCLE	A
	YPL262W	FUM1	95	TCA	Class II	TCA CYCLE	A
	YDR148C	KGD2	37	TCA	Class II	TCA CYCLE	B
	YGR244C	LSC2	147	TCA	Class II	TCA CYCLE	B
	YLR304C	ACO1	149	TCA	Class II	TCA CYCLE	B
	YNR001C	CIT1	95	TCA	Class II	TCA CYCLE	B
	YDL085W	NDE2	95	TCA	Class II	TCA CYCLE	C
	YNL009W	IDP3	149	TCA	Class II	TCA CYCLE	C
	YOR356W	YOR356W	95	TCA	Class II	TCA CYCLE	C
	YPR001W	CIT3	95	TCA	Class II	TCA CYCLE	C
	YJL200C	ACO2	149	TCA	Class II	TCA CYCLE	F
	YOR136W	IDH2	149	TCA	Class II	TCA CYCLE	F
	YPR004C	YPR004C	95	TCA	Class II	TCA CYCLE	F
	YGR207C	YGR207C	95	TCA	Class III	TCA CYCLE	A
	YKL085W	MDH1	95	TCA	Class III	TCA CYCLE	A
Class 10 - AMINO ACID SYNTHESIS	YJR148W	BAT2	8	am.aci. synt.	Class I	AMINO ACID SYNTHESIS	C
	YJL071W	ARG2	51	am.aci. synt.,	Class I	AMINO ACID SYNTHESIS	E
	YHR037W	PUT2	31	am.aci. synt.	Class II	AMINO ACID SYNTHESIS	A
	YNL104C	LEU4	8	am.aci. synt.	Class II	AMINO ACID SYNTHESIS	C
	YER069W	ARG5,6	51	am.aci. synt.	Class II	AMINO ACID SYNTHESIS	D
	YJR109C	CPA2	24	am.aci. synt.	Class II	AMINO ACID SYNTHESIS	D
	YMR062C	ECM40	51	am.aci. synt.	Class II	AMINO ACID SYNTHESIS	D
	YER086W	ILV1	66	am.aci. synt.	Class II	AMINO ACID SYNTHESIS	E
	YJR016C	ILV3	8	am.aci. synt.	Class II	AMINO ACID SYNTHESIS	E
	YLR142W	PUT1	_	am.aci. synt.	Class II	AMINO ACID SYNTHESIS	E
	YOL140W	ARG8	51	am.aci. synt.	Class II	AMINO ACID SYNTHESIS	E
	YCL064C	CHA1	66	am.aci. synt.	Class II	AMINO ACID SYNTHESIS	F
	YDR019C	GCV1	46	am.aci. synt.	Class II	AMINO ACID SYNTHESIS	F
	YDR234W	LYS4	8	am.aci. synt.	Class II	AMINO ACID SYNTHESIS	F
	YGL125W	MET13	46	am.aci. synt.	Class II	AMINO ACID SYNTHESIS	F
	YHR208W	BAT1	8	am.aci. synt.	Class II	AMINO ACID SYNTHESIS	F
	YIL094C	LYS12	19	am.aci. synt.	Class II	AMINO ACID SYNTHESIS	F
	YMR108W	ILV2	8	am.aci. synt.	Class II	AMINO ACID SYNTHESIS	F
	YOR130C	ORT1	51	am.aci. synt.	Class II	AMINO ACID SYNTHESIS	F
	YAL062W	GDH3	31	am.aci. synt.	Class III	AMINO ACID SYNTHESIS	C
	YDL171C	GLT1	31	am.aci. synt.	Class III	AMINO ACID SYNTHESIS	C
	YKL106W	AAT1	80	am.aci. synt.	Class III	AMINO ACID SYNTHESIS	C
	YOR303W	CPA1	24	am.aci. synt.	Class III	AMINO ACID SYNTHESIS	D
	YAL044C	GCV3	46	am.aci. synt.	Class III	AMINO ACID SYNTHESIS	F
	YDL131W	LYS21	8	am.aci. synt.	Class III	AMINO ACID SYNTHESIS	F
	YER183C	FAU1	46	am.aci. synt.	Class III	AMINO ACID SYNTHESIS	F
	YGR155W	CYS4	66	am.aci. synt.	Class III	AMINO ACID SYNTHESIS	F
	YLR355C	ILV5	8	am.aci. synt.	Class III	AMINO ACID SYNTHESIS	F
	YMR189W	GCV2	46	am.aci. synt.	Class III	AMINO ACID SYNTHESIS	F
	YNL256W	FOL1	46	am.aci. synt.	Class III	AMINO ACID SYNTHESIS	F
	YPL023C	MET12	46	am.aci. synt.	Class III	AMINO ACID SYNTHESIS	F
Class 11 - METABOLISM	YBR221C	PDB1	37	Pyr,/?-ketoglutaratedehy,	Class I	METABOLISM	C
	YNL071W	LAT1	37	Pyr,/?-ketoglutaratedehy,	Class I	METABOLISM	C
	YGR193C	PDX1	37	Pyr,/?-ketoglutaratedehy,	Class III	METABOLISM	B
	YER178W	PDA1	37	Pyr,/?-ketoglutaratedehy,	Class III	METABOLISM	C
	YBL064C	PRX1	37	Pyr,/?-ketoglutaratedehy,	Class III	METABOLISM	C
	YBR208C	DUR1,2	37	Pyr,/?-ketoglutaratedehy,	Class III	METABOLISM	E
	YKL029C	MAE1	37	Pyr,/?-ketoglutaratedehy,	Class III	METABOLISM	E
	YHR120W	MSH1	105	ResponsetoDNAdamage	Class I	METABOLISM	F
	YGR094W	VAS1	35	ResponsetoDNAdamage	Class II	METABOLISM	F
	YCR028C-A	RIM1	35	ResponsetoDNAdamage	Class III	METABOLISM	A
	YBR136W	MEC1	35	ResponsetoDNAdamage	Class III	METABOLISM	C
	YMR234W	RNH1	35	ResponsetoDNAdamage	Class III	METABOLISM	E
	YNL312W	RFA2	35	ResponsetoDNAdamage	Class III	METABOLISM	F
	YIL070C	MAM33	41	DNAreplication	Class I	METABOLISM	A
	YER170W	ADK2	41	DNAreplication	Class II	METABOLISM	A
	YIL066C	RNR3	41	DNAreplication	Class II	METABOLISM	C
	YJL026W	RNR2	41	DNAreplication	Class III	METABOLISM	D
	YER070W	RNR1	41	DNAreplication	Class III	METABOLISM	F
	YGR180C	RNR4	41	DNAreplication	Class III	METABOLISM	D
	YML060W	OGG1	136	dnaREPLICATION	Class III	METABOLISM	F
	YDR226W	ADK1	41	DNAreplication	Class III	METABOLISM	F
	YDL142C	CRD1	48	Glycerolmet,	Class I	METABOLISM	C
	YBR029C	CDS1	48	Glycerolmet,	Class II	METABOLISM	A
	YIL155C	GUT2	48	Glycerolmet,	Class II	METABOLISM	C
	YHL032C	GUT1	48	Glycerolmet,	Class II	METABOLISM	C
	YOL059W	GPD2	48	Glycerolmet,	Class II	METABOLISM	E
	YDL022W	GPD1	48	Glycerolmet,	Class III	METABOLISM	C
	YBL015W	ACH1	103	Alcohol/aldehydedehy,	Class II	METABOLISM	A
	YOR374W	ALD4	103	Alcohol/aldehydedehy,	Class II	METABOLISM	C
	YAL054C	ACS1	103	Alcohol/aldehydedehy,	Class II	METABOLISM	C
	YLR153C	ACS2	103	Alcohol/aldehydedehy,	Class III	METABOLISM	A
	YMR083W	ADH3	103	Alcohol/aldehydedehy,	Class III	METABOLISM	A
	YOL086C	ADH1	103	Alcohol/aldehydedehy,	Class III	METABOLISM	A
	YPL061W	ALD6	103	Alcohol/aldehydedehy,	Class III	METABOLISM	C
	YDL168W	SFA1	103	Alcohol/aldehydedehy,	Class III	METABOLISM	D
	YER073W	ALD5	103	Alcohol/aldehydedehy,	Class III	METABOLISM	E
	YBR003W	COQ1	7	Ubiquinonemet,	Class I	METABOLISM	A
	YOL096C	COQ3	7	Ubiquinonemet,	Class I	METABOLISM	B
	YGR255C	COQ6	7	Ubiquinonemet,	Class I	METABOLISM	C
	YGL119W	ABC1	7	Ubiquinonemet,	Class I	METABOLISM	F
	YNR041C	COQ2	7	Ubiquinonemet,	Class II	METABOLISM	B
	YML110C	COQ5	7	Ubiquinonemet,	Class II	METABOLISM	B
	YOR125C	CAT5	7	Ubiquinonemet,	Class II	METABOLISM	B
	YPL109C	YPL109C	7	Ubiquinonemet,	Class II	METABOLISM	C
	YDR204W	COQ4	7	Ubiquinonemet,	Class II	METABOLISM	C
	YDR538W	PAD1	7	Ubiquinonemet,	Class II	METABOLISM	D
	YLR056W	ERG3	7	Ubiquinonemet,	Class II	METABOLISM	F
	YLR201C	COQ9	3	Ubiquinonemet,	Class III	METABOLISM	C
	YNL169C	PSD1	30	Fattyacidsyn,	Class I	METABOLISM	A
	YPR140W	TAZ1	14	Fattyacidsyn,	Class I	METABOLISM	A
	YMR207C	HFA1	12	Fattyacidsyn,	Class I	METABOLISM	C
	YLR239C	LIP2	138	Fattyacidsyn,	Class II	METABOLISM	A
	YHR067W	HTD2	_	Fattyacidsyn,	Class II	METABOLISM	B
	YMR241W	YHM2	30	Fattyacidsyn,	Class II	METABOLISM	F
	YKL182W	FAS1	12	Fattyacidsyn,	Class III	METABOLISM	C
	YKL150W	MCR1	148	Fattyacidsyn,	Class III	METABOLISM	C
	YOR317W	FAA1	75	Fattyacidsyn,	Class III	METABOLISM	C
	YML008C	ERG6	75	Fattyacidsyn,	Class III	METABOLISM	C
	YIL124W	AYR1	30	Fattyacidsyn,	Class III	METABOLISM	C
	YDR214W	AHA1	12	Fattyacidsyn,	Class III	METABOLISM	D
	YKL120W	OAC1	30	Fattyacidsyn,	Class III	METABOLISM	F
UNCLASSIFIED CLASS I	YER078C	YER078C	87	No data	Class I	UNKNOWN	A
	YFL036W	RPO41	157	RNo data pol	Class I	UNKNOWN	A
	YGR021W	YGR021W	38	No data	Class I	UNKNOWN	A
	YGR101W	PCP1	90	peptidase	Class I	UNKNOWN	A
	YHL014C	YLF2	73	No data	Class I	UNKNOWN	A
	YHR076W	PTC7	121	phosphatase	Class I	UNKNOWN	A
	YIR024C	YIR024C	122	No data	Class I	UNKNOWN	A
	YJL131C	YJL131C	_	No data	Class I	UNKNOWN	A
	YJR080C	FMP26	_	No data	Class I	UNKNOWN	A
	YJR100C	YJR100C	14	No data	Class I	UNKNOWN	A
	YKL087C	CYT2	144	c1 maturation	Class I	UNKNOWN	A
	YKR016W	FMP13	2	No data	Class I	UNKNOWN	A
	YLR077W	FMP25	_	No data	Class I	UNKNOWN	A
	YLR090W	XDJ1	38	chaperone	Class I	UNKNOWN	A
	YLR168C	YLR168C	_	No data	Class I	UNKNOWN	A
	YLR253W	YLR253W	14	No data	Class I	UNKNOWN	A
	YML050W	YML050W	_	No data	Class I	UNKNOWN	A
	YMR157C	FMP39	_	No data	Class I	UNKNOWN	A
	YMR293C	HER2	_	No data	Class I	UNKNOWN	A
	YNR040W	YNR040W	_	No data	Class I	UNKNOWN	A
	YOR286W	FMP31	100	No data	Class I	UNKNOWN	A
	YOR354C	MSC6	_	No data	Class I	UNKNOWN	A
	YER182W	FMP10	_	No data	Class I	UNKNOWN	B
	YLR218C	YLR218C	137	No data	Class I	UNKNOWN	B
	YMR267W	PPA2	17	phosphatase	Class I	UNKNOWN	B
	YMR302C	PRP12	83	No data	Class I	UNKNOWN	B
	YFR044C	DUG1	70	peptidase	Class I	UNKNOWN	C
	YGL059W	PKP2	76	KiNo datase	Class I	UNKNOWN	C
	YIL077C	YIL077C	26	No data	Class I	UNKNOWN	C
	YLR091W	YLR091W	28	No data	Class I	UNKNOWN	C
	YMR115W	MGR3	_	prot degrad.	Class I	UNKNOWN	C
	YDL178W	DLD2	153	No data	Class I	UNKNOWN	F
	YER077C	YER077C	101	No data	Class I	UNKNOWN	F
	YPL103C	FMP30	_	No data	Class I	UNKNOWN	F
UNCLASSIFIED CLASS II	YCL014W	BUD3	79	No data	Class II	UNKNOWN	A
	YGR234W	YHB1	1	No data	Class II	UNKNOWN	A
	YJR048W	CYC1	71	No data	Class II	UNKNOWN	A
	YJR077C	MIR1	70	No data	Class II	UNKNOWN	A
	YKL134C	OCT	_	No data	Class II	UNKNOWN	A
	YKR042W	UTH1	133	No data	Class II	UNKNOWN	A
	YLR188W	MDL1	96	No data	Class II	UNKNOWN	A
	YMR228W	MTF1	157	No data	Class II	UNKNOWN	A
	YNL213C	YNL213C	_	No data	Class II	UNKNOWN	A
	YOR037W	CYC2	93	No data	Class II	UNKNOWN	A
	YOR114W	YOR114W	_	No data	Class II	UNKNOWN	A
	YDL119C	YDL119C	68	No data	Class II	UNKNOWN	B
	YDL174C	DLD1	95	No data	Class II	UNKNOWN	B
	YEL052W	AFG1	_	No data	Class II	UNKNOWN	B
	YHL021C	FMP12	90	No data	Class II	UNKNOWN	B
	YHR198C	FMP22	_	No data	Class II	UNKNOWN	B
	YKL218C	SRY1	11	No data	Class II	UNKNOWN	B
	YMR097C	MTG1	_	No data	Class II	UNKNOWN	B
	YNL100W	YNL100W	77	No data	Class II	UNKNOWN	B
	YPL134C	ODC1	63	No data	Class II	UNKNOWN	B
	YPR002W	PDH1	109	No data	Class II	UNKNOWN	B
	YPR024W	YME1	83	No data	Class II	UNKNOWN	B
	YER032W	FIR1	_	No data	Class II	UNKNOWN	B
	YLR036C	YLR036C	_	No data	Class II	UNKNOWN	B
	YAL008W	FUN14	_	No data	Class II	UNKNOWN	C
	YBR026C	ETR1	43	No data	Class II	UNKNOWN	C
	YDL027C	YDL027C	43	No data	Class II	UNKNOWN	C
	YER014W	HEM14	56	No data	Class II	UNKNOWN	C
	YGL080W	FMP37	_	No data	Class II	UNKNOWN	C
	YGR031W	YGR031W	_	No data	Class II	UNKNOWN	C
	YGR243W	FMP43	_	No data	Class II	UNKNOWN	C
	YHR106W	TRR2	111	No data	Class II	UNKNOWN	C
	YIL042C	YIL042C	73	No data	Class II	UNKNOWN	C
	YIL136W	OM45	109	No data	Class II	UNKNOWN	C
	YJL005W	CYR1	36	No data	Class II	UNKNOWN	C
	YJL023C	PET130	_	No data	Class II	UNKNOWN	C
	YJL094C	KHA1	88	No data	Class II	UNKNOWN	C
	YKR066C	CCP1	71	No data	Class II	UNKNOWN	C
	YLR454W	FMP27	_	No data	Class II	UNKNOWN	C
	YML054C	CYB2	95	No data	Class II	UNKNOWN	C
	YMR165C	SMP2	_	No data	Class II	UNKNOWN	C
	YNL066W	SUN4	133	No data	Class II	UNKNOWN	C
	YNR002C	FUN34	124	No data	Class II	UNKNOWN	C
	YOR176W	HEM15	56	No data	Class II	UNKNOWN	C
	YPL004C	LSP1	29	No data	Class II	UNKNOWN	C
	YPL188W	POS5	_	No data	Class II	UNKNOWN	C
	YPL222W	FMP40	_	No data	Class II	UNKNOWN	C
	YPR006C	ICL2	109	No data	Class II	UNKNOWN	C
	YCR099C	YCR099C	_	No data	Class II	UNKNOWN	C
	YDR129C	SAC6	_	No data	Class II	UNKNOWN	C
	YDR342C	HXT7	_	No data	Class II	UNKNOWN	C
	YDR343C	HXT6	_	No data	Class II	UNKNOWN	C
	YDR384C	ATO3	_	No data	Class II	UNKNOWN	C
	YKL217W	JEN1	_	No data	Class II	UNKNOWN	C
	YOL048C	YOL048C	_	No data	Class II	UNKNOWN	C
	YBR047W	FMP23	_	No data	Class II	UNKNOWN	D
	YCL044C	MGR1	_	No data	Class II	UNKNOWN	D
	YDL222C	FMP45	121	No data	Class II	UNKNOWN	D
	YOR350C	MNE1	_	No data	Class II	UNKNOWN	D
	YGR049W	SCM4	_	No data	Class II	UNKNOWN	D
	YPL036W	PMA2	_	No data	Class II	UNKNOWN	D
	YJR111C	YJR111C	_	No data	Class II	UNKNOWN	E
	YEL017C-A	PMP2	_	No data	Class II	UNKNOWN	E
	YBL057C	PTH2	130	No data	Class II	UNKNOWN	F
	YBR078W	ECM33	85	No data	Class II	UNKNOWN	F
	YBR106W	PHO88	55	No data	Class II	UNKNOWN	F
	YDR232W	HEM1	19	No data	Class II	UNKNOWN	F
	YHR003C	YHR003C	_	No data	Class II	UNKNOWN	F
	YKL027W	YKL027W	_	No data	Class II	UNKNOWN	F
	YLR106C	MDN1	85	No data	Class II	UNKNOWN	F
	YML061C	PIF1	112	No data	Class II	UNKNOWN	F
	YOR017W	PET127	97	No data	Class II	UNKNOWN	F
	YPL091W	GLR1	111	No data	Class II	UNKNOWN	F
	YDR518W	EUG1	_	No data	Class II	UNKNOWN	F
	YER061C	CEM1	_	No data	Class II	UNKNOWN	F
	YGL008C	PMA1	_	No data	Class II	UNKNOWN	F
UNCLASSIFIED CLASS III	YAL046C	YAL046C	55	No data	Class III	UNKNOWN	A
	YBL059W	YBL059W	141	No data	Class III	UNKNOWN	A
	YBR262C	FMP51	47	No data	Class III	UNKNOWN	A
	YDR487C	RIB3	_	No data	Class III	UNKNOWN	A
	YDR493W	FMP36	17	Unknown2	Class III	UNKNOWN	A
	YDR511W	ACN9	18	No data	Class III	UNKNOWN	A
	YFR011C	YFR011C	_	No data	Class III	UNKNOWN	A
	YGL057C	YGL057C	_	No data	Class III	UNKNOWN	A
	YGL226W	YGL226W	47	No data	Class III	UNKNOWN	A
	YHR031C	RRM3	112	No data	Class III	UNKNOWN	A
	YHR059W	FYV4	99	MRPS	Class III	UNKNOWN	A
	YHR100C	YHR100C	_	No data	Class III	UNKNOWN	A
	YJL046W	YJL046W	_	No data	Class III	UNKNOWN	A
	YKL192C	ACP1	108	No data	Class III	UNKNOWN	A
	YLR059C	REX2	83	No data	Class III	UNKNOWN	A
	YLR089C	ALT1	31	No data	Class III	UNKNOWN	A
	YLR351C	NIT3	40	No data	Class III	UNKNOWN	A
	YLR390W	ECM19	18	No data	Class III	UNKNOWN	A
	YML078W	CPR3	43	No data	Class III	UNKNOWN	A
	YLR027C	AAT2	_	No data	Class III	UNKNOWN	A
	YBL095W	YBL095W	_	No data	Class III	UNKNOWN	B
	YDR305C	HNT2	135	No data	Class III	UNKNOWN	B
	YEL047C	YEL047C	_	No data	Class III	UNKNOWN	B
	YER048W-A	YER048W-A	_	No data	Class III	UNKNOWN	B
	YFL030W	AGX1	26	No data	Class III	UNKNOWN	B
	YGR015C	YGR015C	_	No data	Class III	UNKNOWN	B
	YGR029W	ERV1	_	No data	Class III	UNKNOWN	B
	YJR095W	SFC1	104	No data	Class III	UNKNOWN	B
	YLR132C	YLR132C	_	No data	Class III	UNKNOWN	B
	YOL071W	EMI5	11	No data	Class III	UNKNOWN	B
	YBR230C	YBR230C	_	No data	Class III	UNKNOWN	C
	YBR269C	FMP21	63	No data	Class III	UNKNOWN	C
	YCR083W	TRX3	111	No data	Class III	UNKNOWN	C
	YDR070C	FMP16	_	No data	Class III	UNKNOWN	C
	YDR272W	GLO2	21	No data	Class III	UNKNOWN	C
	YDR512C	EMI1	18	No data	Class III	UNKNOWN	C
	YDR513W	TTR1	128	No data	Class III	UNKNOWN	C
	YEL059C-A	SOM1	137	No data	Class III	UNKNOWN	C
	YER004W	FMP52	_	No data	Class III	UNKNOWN	C
	YHR008C	SOD2	81	No data	Class III	UNKNOWN	C
	YIL087C	YIL087C	_	No data	Class III	UNKNOWN	C
	YIR038C	GTT1	128	No data	Class III	UNKNOWN	C
	YJL161W	FMP33	76	No data	Class III	UNKNOWN	C
	YJR104C	SOD1	81	No data	Class III	UNKNOWN	C
	YJR136C	YJR136C	_	No data	Class III	UNKNOWN	C
	YKL162C	YKL162C	101	No data	Class III	UNKNOWN	C
	YKR049C	FMP46	_	No data	Class III	UNKNOWN	C
	YLR125W	YLR125W	17	Unknown2	Class III	UNKNOWN	C
	YLR270W	DCS1	_	No data	Class III	UNKNOWN	C
	YLR281C	YLR281C	27	Unknown1	Class III	UNKNOWN	C
	YLR290C	YLR290C	27	Unknown1	Class III	UNKNOWN	C
	YMR072W	ABF2	13	No data	Class III	UNKNOWN	C
	YMR110C	YMR110C	_	No data	Class III	UNKNOWN	C
	YMR150C	IMP1	152	No data	Class III	UNKNOWN	C
	YMR152W	YIM1	_	No data	Class III	UNKNOWN	C
	YNL003C	PET8	113	No data	Class III	UNKNOWN	C
	YNL055C	POR1	93	No data	Class III	UNKNOWN	C
	YNL200C	YNL200C	_	No data	Class III	UNKNOWN	C
	YOL025W	LAG2	_	No data	Class III	UNKNOWN	C
	YOR215C	YOR215C	_	No data	Class III	UNKNOWN	C
	YOR285W	YOR285W	91	No data	Class III	UNKNOWN	C
	YPL099C	FMP14	_	No data	Class III	UNKNOWN	C
	YPL107W	YPL107W	_	No data	Class III	UNKNOWN	C
	YPL148C	PPT2	_	No data	Class III	UNKNOWN	C
	YDL130W-A	STF1	_	No data	Class III	UNKNOWN	C
	YGR008C	STF2	_	No data	Class III	UNKNOWN	C
	YPR061C	JID1	_	No data	Class III	UNKNOWN	C
	YER096W	SHC1	_	No data	Class III	UNKNOWN	D
	YFL027C	GYP8	89	No data	Class III	UNKNOWN	D
	YKL055C	OAR1	127	No data	Class III	UNKNOWN	D
	YLL060C	GTT2	128	No data	Class III	UNKNOWN	D
	YOL081W	IRA2	36	No data	Class III	UNKNOWN	D
	YOR040W	GLO4	21	No data	Class III	UNKNOWN	D
	YOR251C	YOR251C	59	No data	Class III	UNKNOWN	D
	YLR216C	CPR6	_	No data	Class III	UNKNOWN	D
	YNL133C	FYV6	_	No data	Class III	UNKNOWN	D
	YBR034C	HMT1	108	No data	Class III	UNKNOWN	E
	YBR063C	YBR063C	_	No data	Class III	UNKNOWN	E
	YBR104W	YMC2	_	No data	Class III	UNKNOWN	E
	YDR065W	YDR065W	_	No data	Class III	UNKNOWN	E
	YGL240W	DOC1	_	No data	Class III	UNKNOWN	E
	YGR096W	TPC1	_	No data	Class III	UNKNOWN	E
	YIL114C	POR2	93	No data	Class III	UNKNOWN	E
	YLL018C-A	COX19	_	No data	Class III	UNKNOWN	E
	YMR038C	CCS1	81	No data	Class III	UNKNOWN	E
	YNL064C	YDJ1	70	No data	Class III	UNKNOWN	E
	YNL111C	CYB5	_	No data	Class III	UNKNOWN	E
	YNL186W	UBP10	99	Ubiq. Degrad.	Class III	UNKNOWN	E
	YPL159C	PET20	_	No data	Class III	UNKNOWN	E
	YPR058W	YMC1	_	No data	Class III	UNKNOWN	E
	YAL039C	CYC3	56	No data	Class III	UNKNOWN	F
	YBL087C	RPL23A	_	No data	Class III	UNKNOWN	F
	YDL157C	YDL157C	77	No data	Class III	UNKNOWN	F
	YDR044W	HEM13	56	No data	Class III	UNKNOWN	F
	YDR341C	YDR341C	84	No data	Class III	UNKNOWN	F
	YDR478W	SNM1	83	No data	Class III	UNKNOWN	F
	YER168C	CCA1	_	No data	Class III	UNKNOWN	F
	YGR204W	ADE3	46	Folateandglycinemet,	Class III	UNKNOWN	F
	YHR179W	OYE2	153	No data	Class III	UNKNOWN	F
	YIR042C	YIR042C	_	No data	Class III	UNKNOWN	F
	YKL212W	SAC1	34	No data	Class III	UNKNOWN	F
	YNL292W	PUS4	65	No data	Class III	UNKNOWN	F
	YNR018W	YNR018W	_	No data	Class III	UNKNOWN	F
	YOR241W	MET7	145	No data	Class III	UNKNOWN	F
	YOR271C	YOR271C	_	No data	Class III	UNKNOWN	F
	YOR274W	MOD5	_	No data	Class III	UNKNOWN	F
	YOR305W	YOR305W	_	No data	Class III	UNKNOWN	F
	YPR033C	HTS1	108	No data	Class III	UNKNOWN	F
	YPR183W	DPM1	91	No data	Class III	UNKNOWN	F
	YDL059C	RAD59	_	No data	Class III	UNKNOWN	F
	YDR023W	SES1	_	No data	Class III	UNKNOWN	F
	YFL022C	FRS2	_	No data	Class III	UNKNOWN	F
	YLR060W	FRS1	_	No data	Class III	UNKNOWN	F
	YLR285W	NNT1	_	No data	Class III	UNKNOWN	F
	YOL098C	YOL098C	_	No data	Class III	UNKNOWN	F
	YOR335C	ALA1	_	No data	Class III	UNKNOWN	F
	YPL208W	RKM1	_	No data	Class III	UNKNOWN	F
